# Supplementary material
Source: PubMed Central journal article supplement (PMC170948)

**WT**

**MSCV-TP-AE**

**MSCV-TP-148**

**Spleen**

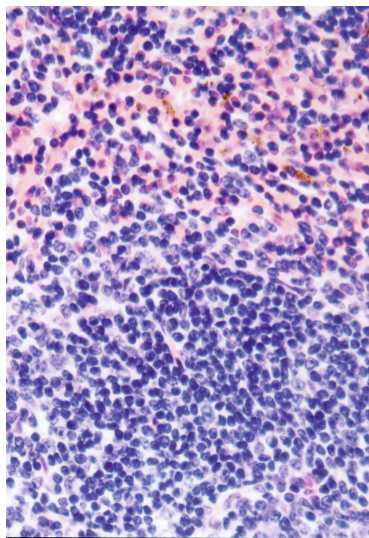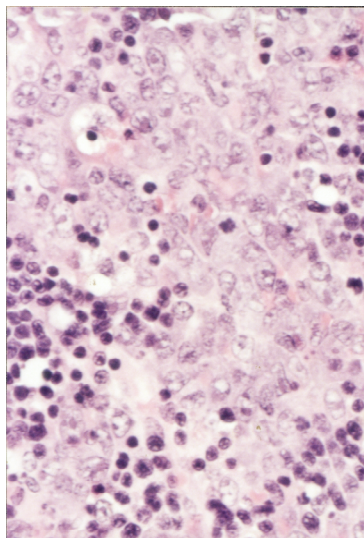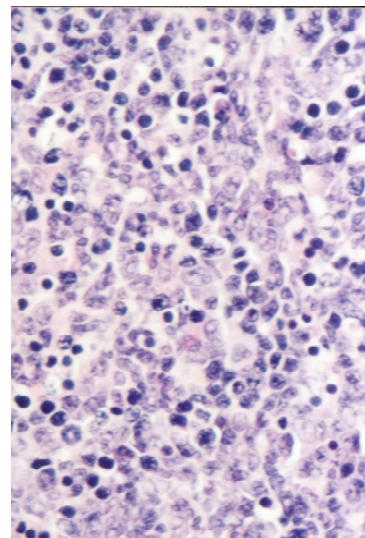

**Liver**

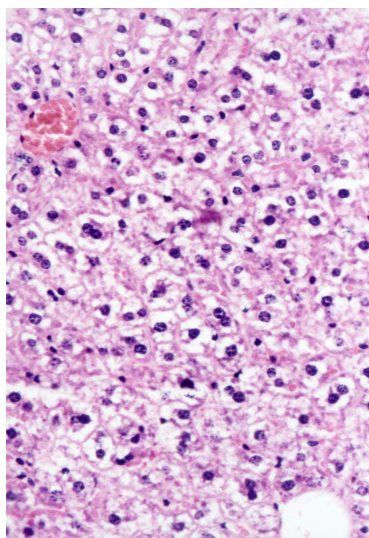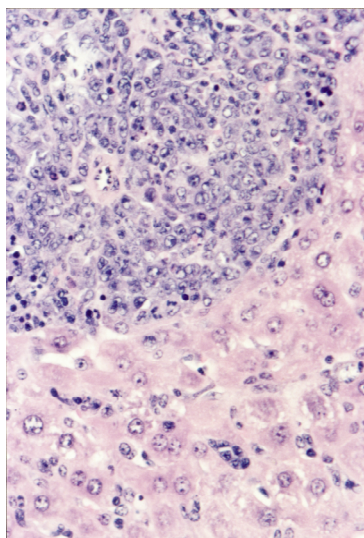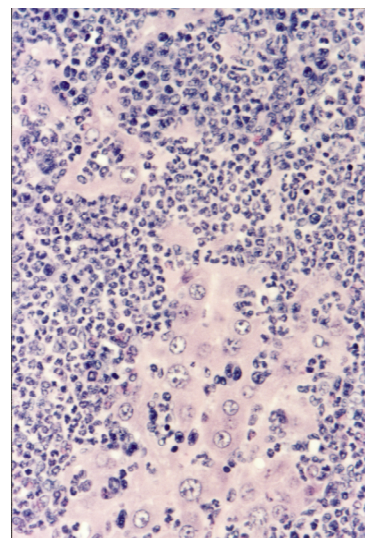

Supplement: pnas_1531730100_4.pdf [file pnas_1531730100_4.pdf]

WT ————— TP-AE TP-148

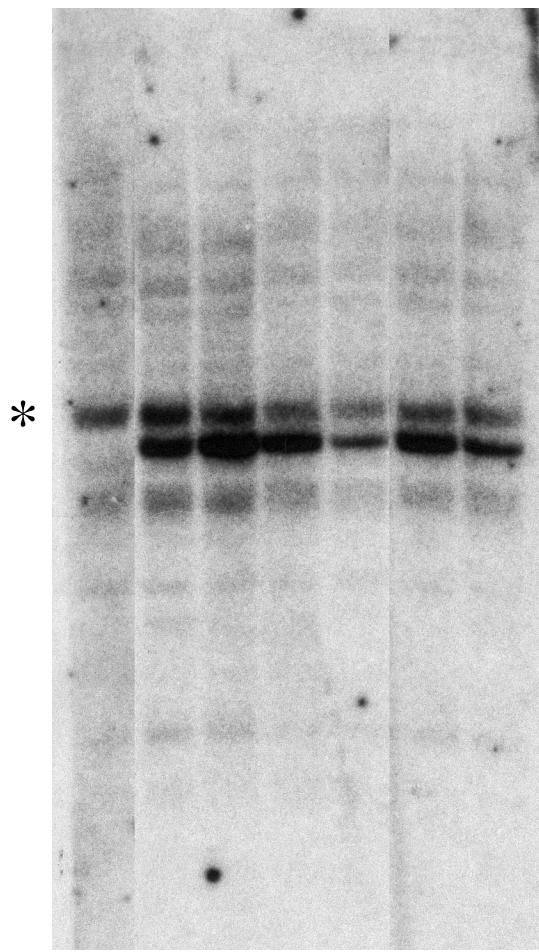

XbaI

WT ————— TP-AE TP-148

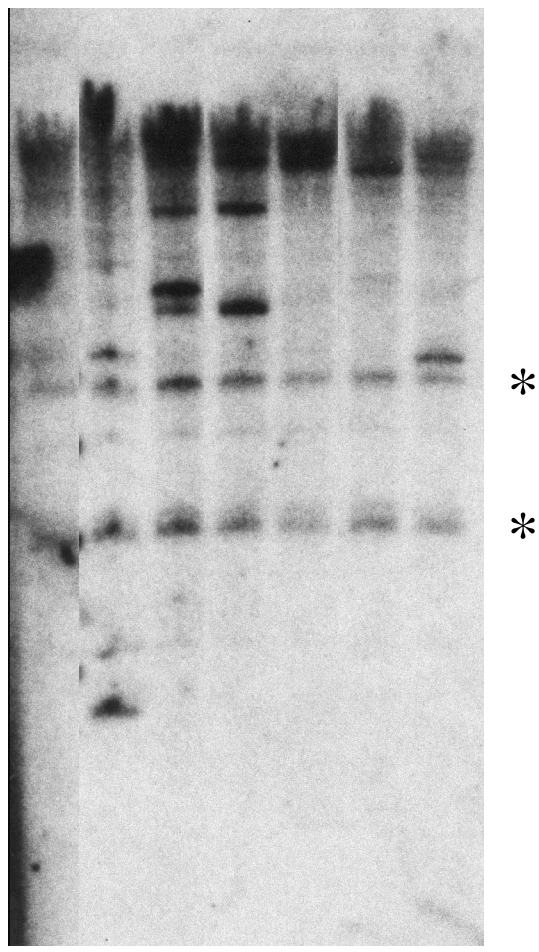

XhoI

Supplement: pnas_1531730100_6.pdf [file pnas_1531730100_6.pdf]

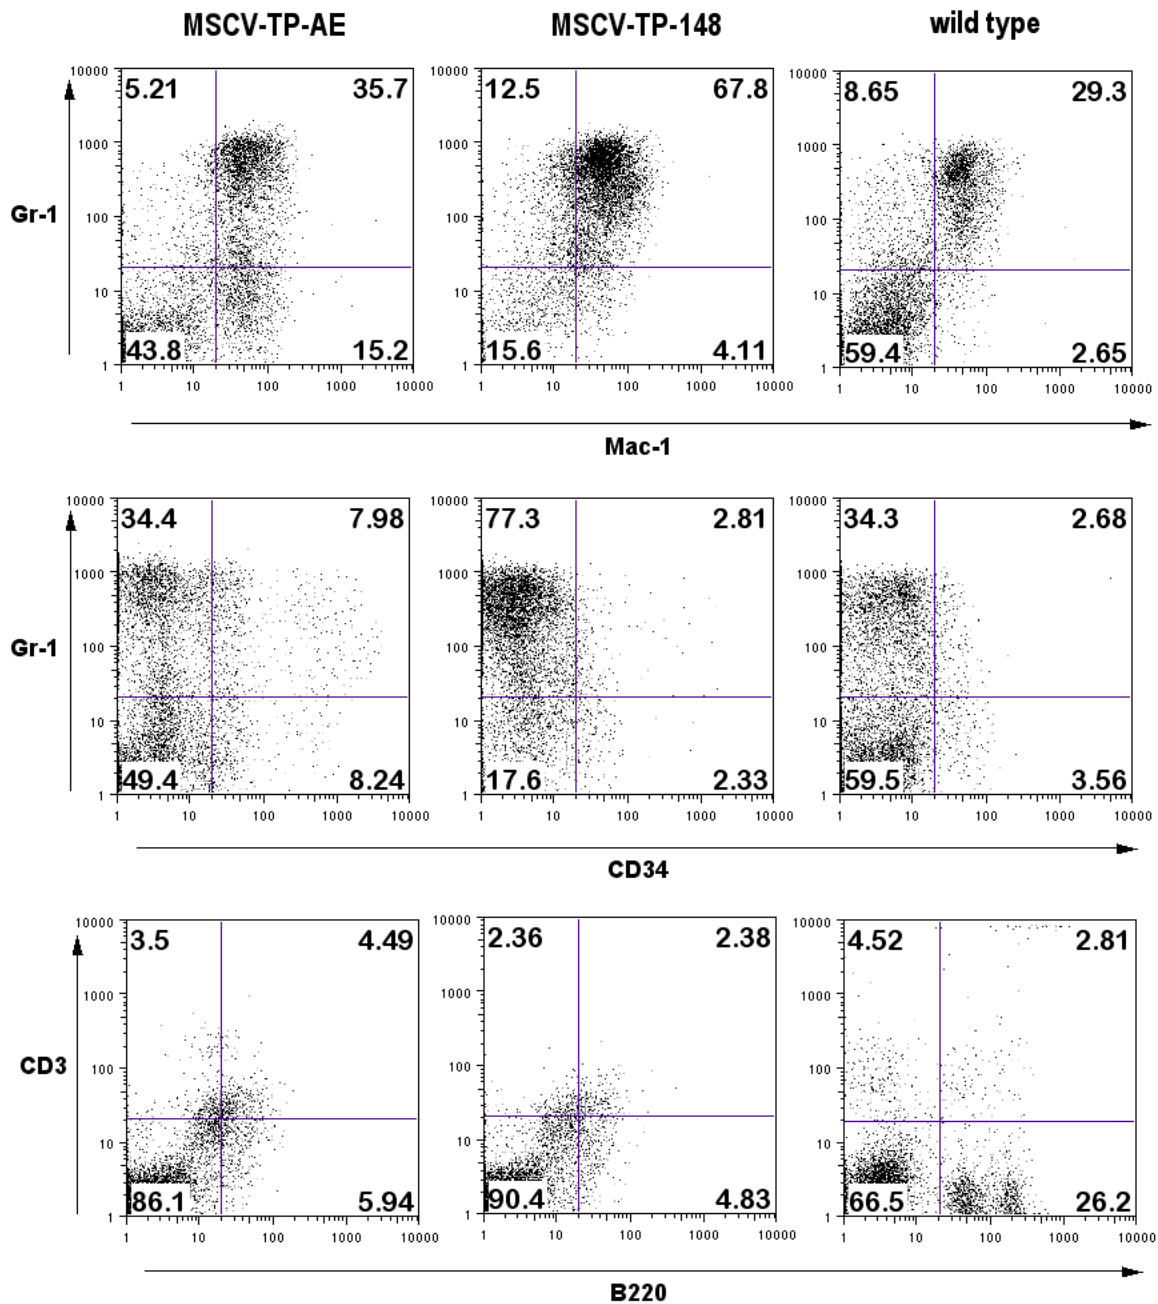

Supplement: pnas_1531730100_8.pdf [file pnas_1531730100_8.pdf]

**MSCV-GFP**

**AE-GFP 2 mo.**

**AE-GFP 9 mo.**

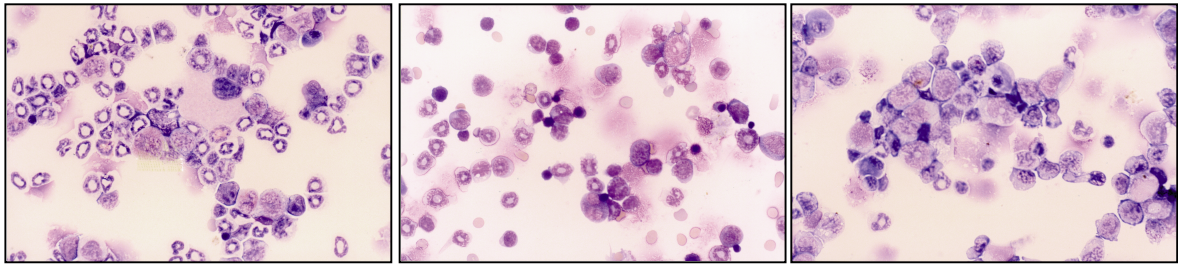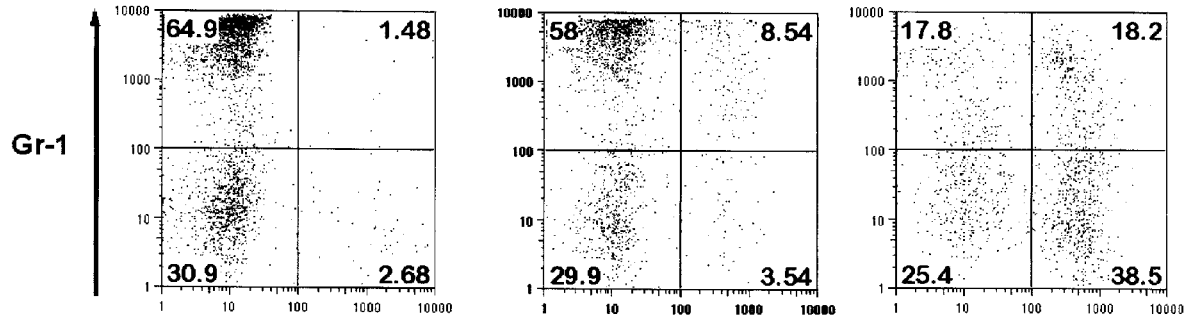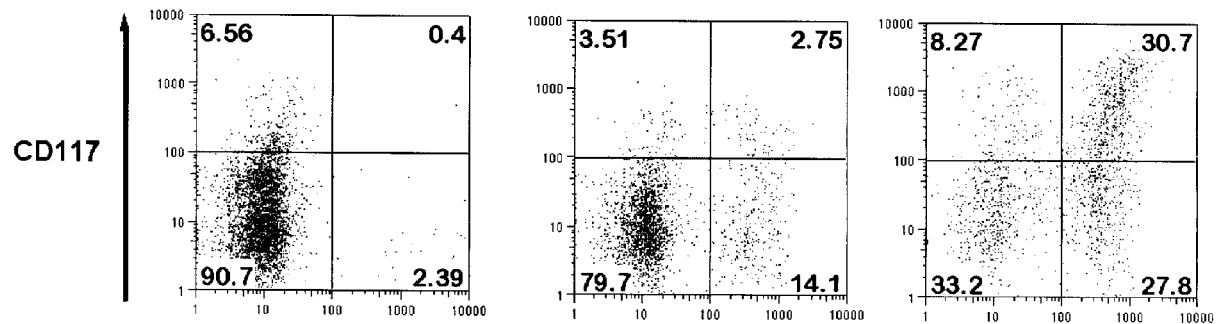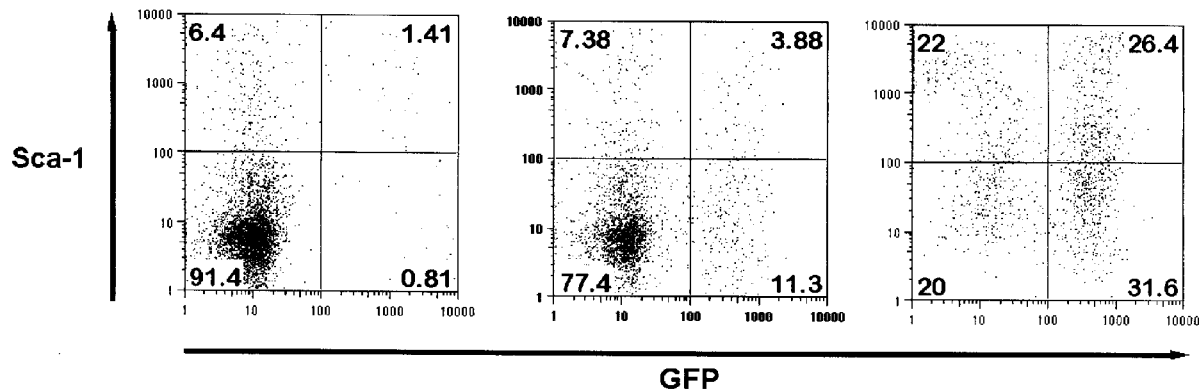

Supplement: pnas_1531730100_9.pdf [file pnas_1531730100_9.pdf]
